# Supplementary material for: Novel Mode Engineering for β-Alanine Production in Escherichia coli with the Guide of Adaptive Laboratory Evolution
Source: PubMed Central journal article supplement (PMC8000549; doi:10.3390/microorganisms9030600), 2021-03-15
Supplement: microorganisms-09-00600-s001.pdf [file microorganisms-09-00600-s001.pdf]

**Table S1.** Plasmids used in this study.

| Plasmids                                    | Relevant characteristics                                                                                                                      | Source or reference    |
|---------------------------------------------|-----------------------------------------------------------------------------------------------------------------------------------------------|------------------------|
| pET24a                                      | Km <sup>R</sup> , T7 promoter, T7 terminator                                                                                                  | Lab stock              |
| pET24a-tac                                  | T7 promoter was replaced with tac promoter, T7 tag and 6×His tag was deleted                                                                  | This study             |
| pET24a- <i>panD</i>                         | the T7 tag and 6×His tag of pET24a-tac was replaced with the <i>panD</i> gene from <i>Corynebacterium glutamicum</i>                          | This study             |
| pET24a- <i>AspDH</i>                        | the T7 tag and 6×His tag of pET24a-tac was replaced with the <i>AspDH</i> gene from <i>Klebsiella pneumoniae</i>                              | This study             |
| pUC19                                       | Amp <sup>r</sup>                                                                                                                              | Lab stock              |
| pUC19-FRT-Kan-FRT                           | the cassette of FRT-Kan-FRT was amplified from pKD13 plasmid and cloned onto the plasmid of pUC19                                             | This study             |
| pUC19-FRT-Kan-FRT- <i>mhpB</i>              | <i>mhpB</i> gene was amplified and cloned onto the plasmid of pUC19-FRT-Kan-FRT                                                               | This study             |
| pUC19-FRT-Kan-FRT- <i>mhpB</i> <sup>*</sup> | <i>mhpB</i> gene containing all genic mutations listed in the genic mutation library                                                          | This study             |
| pUC19-FRT-Kan-FRT- <i>mhpD</i>              | <i>mhpD</i> gene was amplified and cloned onto the plasmid of pUC19-FRT-Kan-FRT                                                               | This study             |
| pUC19-FRT-kan-FRT- <i>mhpD</i> <sup>*</sup> | <i>mhpD</i> gene containing all genic mutations listed in the genic mutation library                                                          | This study             |
| pUC19-FRT-Kan-FRT- <i>rcsA</i>              | <i>rcsA</i> gene was amplified and cloned onto the plasmid of pUC19-FRT-Kan-FRT                                                               | This study             |
| pUC19-FRT-kan-FRT- <i>rcsA</i> <sup>*</sup> | <i>rcsA</i> gene containing all genic mutations listed in the genic mutation library                                                          | This study             |
| pET24a- <i>panD</i> - <i>AspDH</i>          | pET24a-tac containing the <i>panD</i> gene from <i>Corynebacterium glutamicum</i> and the <i>AspDH</i> gene from <i>Klebsiella pneumoniae</i> | This study             |
| pET24a- <i>gfp</i>                          | pET24a containing <i>gfp</i> gene                                                                                                             | This study             |
| pET24a-tac- <i>gfp</i>                      | pET24a-tac containing <i>gfp</i> gene                                                                                                         | This study             |
| pKD46                                       | Amp <sup>r</sup> , $\gamma$ βexo (red recombinase), Temperature-conditional replicon                                                          | CGSC <sup>a</sup> [40] |
| pKD13                                       | Amp <sup>r</sup> , Kan <sup>r</sup> , FRT-Kan-FRT cassette                                                                                    | CGSC <sup>a</sup> [40] |
| pCP20                                       | Amp <sup>r</sup> , FLP, Temperature-conditional replicon                                                                                      | CGSC <sup>a</sup> [40] |

<sup>a</sup> Single-nucleotide variant. <sup>b</sup> Deletion mutation. <sup>c</sup> Insertion mutation. <sup>d</sup> Amino acid mutations.

**Table S2.** Primers used in this study.

| Primers            | Sequence (5'-3') restriction <i>italic/underlined</i>                          | Restriction sites |
|--------------------|--------------------------------------------------------------------------------|-------------------|
| <i>ppc</i> -pKD13F | GAAGGATACAGGGCTATCAAACGATAAG<br>ATGGGGTGTCTGGGGTAATATGGTGTAGG<br>CTGGAGCTGCTTC |                   |
| <i>ppc</i> -pKD13R | AAAGCACGAGGGTTTGCAGAAGAGGAA<br>GATTAGCCGGTATTACGCATACCATTCCG<br>GGGATCCGTCGACC |                   |

|                     |                                                                                 |
|---------------------|---------------------------------------------------------------------------------|
| <i>YppcF</i>        | GTAGAGCAGTGCCCAACCCAGG                                                          |
| <i>YppcR</i>        | TTTGCTGAAGCGATTTTCGCAG                                                          |
| <i>recE</i> -pKD13F | GCAGATCGGCTTTTTCGATTGGTGGTTGC<br>TTAGTCATTTGCATATTCCTTGTGTAGGCT<br>GGAGCTGCTTC  |
| <i>recE</i> -pKD13R | ATTCAGTGAACAAAACGAATTTTAATCTG<br>AGTTGAGGTTAAAAACAATGATTCCGG<br>GGATCCGTCGACC   |
| <i>YrecEF</i>       | CCGAGCTGTGAACACTGTACGAT                                                         |
| <i>YrecER</i>       | CACTGTGGTTGATATCGATGGTCC                                                        |
| <i>mhpF</i> -pKD13F | TCAGTTGCTGCGACATTTTCAAGCGCAGC<br>CCAAAAGGAAGTCTGTTCATGGTGTAGG<br>CTGGAGCTGCTTC  |
| <i>mhpF</i> -pKD13R | GACGTCCGAGATATAAAGTTTTTTACCGT<br>TCATGCCGCTTCTCCTGCCTTATCCGGGG<br>ATCCGTCGACC   |
| <i>Y mhpF</i>       | CAAAATGGCCAGTCTGGGTGAAC                                                         |
| <i>Y mhpFR</i>      | CACTTCAATCGAATCCACGCG                                                           |
| <i>ykgF</i> -pKD13F | AGTGATGCATATTGCTGAAGTGTGATGA<br>GCCGCTGAGGATATAAAGATGGTGTAGG<br>CTGGAGCTGCTTC   |
| <i>ykgF</i> -pKD13R | GAGCAACGTTATTCAAAAATTCGCCTCGA<br>TTATCCATTCCTTTCTCCIGATTCCGGGG<br>ATCCGTCGACC   |
| <i>YykgFF</i>       | TCAAAATGGCCGAAATATCCG                                                           |
| <i>YykgFR</i>       | AACATAACATCGCTGGCAAACCTG                                                        |
| <i>mhpB</i> -pUC19F | ATGCACGCTTATCTTCACTGTCTTTCCAC<br>TCGCCGCTGGTGGGGTATGTGTGTAGGCT<br>GGAGCTGCTTC   |
| <i>mhpB</i> -pUC19R | TCAGTTCTCTGTTCTGGCGCTTAACGAGC<br>CAAATCCGGCAATCCACTCCG                          |
| <i>YmhpBF</i>       | ATTCATACCGCACAGGATAACCAC                                                        |
| <i>YmhpBR</i>       | AACCATGCAGCAGGACAACG                                                            |
| <i>mhpD</i> -pUC19F | ATGACGAAGCATACTTTGAGCAACTGG<br>CGGCGGATTTACGCCGCGCCGCGTGTAG<br>GCTGGAGCTGCTTC   |
| <i>mhpD</i> -pUC19R | TCATGACAGACTTCCTTTGGGGCTGCGC<br>TTGAAAATGTTCGAGCAACTG                           |
| <i>YmhpDF</i>       | GCCTGGAAGCTAATCCGAAACA                                                          |
| <i>YmhpDR</i>       | TCAGGCATGTTTCATCAGTCCG                                                          |
| <i>aspA</i> -pKD13F | GCCTTTTTTATTTGTACTACCCTGTACGAT<br>TACTGTTTCGCTTTCATCAGTGTGTAGGCTG<br>GAGCTGCTTC |
| <i>aspA</i> -pKD13R | CTGTGTGTTTAAAGCAAATCATTGGCAGC<br>TTGAAAAAGAAGGTTACATGATTCCGG<br>GGATCCGTCGACC   |
| <i>YaspAF</i>       | CCAATAGCGGCAAGAACCAG                                                            |
| <i>YaspAR</i>       | CGAATCGGTTTTAGCTTATATTGTG                                                       |
| <i>rcsA</i> -pUC19F | ATGTCAACGATTATTATGGATTTATGTAG<br>TTACACCCGACTAGGTTTAAACGTGTAGGC<br>TGGAGCTGCTTC |

|                        |                                                                         |                      |
|------------------------|-------------------------------------------------------------------------|----------------------|
| <i>rcsA</i> -pUC19R    | TTAGCGCATGTTGACAAAAATACCATTAG<br>TCACATTATCCGTCAGTCGGA                  |                      |
| <i>YrcsAF</i>          | AAGCTCACTCACATATCGCAACAT                                                |                      |
| <i>YrcsAR</i>          | GGTACTGGCAGTTGAGGAGTTTAGTG                                              |                      |
| HindIII-FRT-Kan-FRTF   | TTT <u>AAGCTT</u> <sup>a</sup> GTGTAGGCTGGAGCTGCTTC                     | HindIII <sup>a</sup> |
| HindIII-FRT-Kan-FRTR   | TTT <u>AAGCTT</u> <sup>a</sup> ATTCCGGGGATCCGTCGACC                     | HindIII <sup>a</sup> |
| BamHI- <i>mhpBF</i>    | TTT <u>GGATCC</u> <sup>a</sup> ATGCACGCTTATCTTCACTGT<br>CTTTC           | BamHI <sup>a</sup>   |
| EcoRI- <i>mhpBR</i>    | TTT <u>GAATTC</u> <sup>a</sup> TCAGTTCTCTGTTCTGGCGCT<br>TAA             | EcoRI <sup>a</sup>   |
| <i>mhpB</i> *F         | ATTGCCAGCGCCCGCGCGCTATTGCGG                                             |                      |
| <i>mhpB</i> *R         | GAGAATGCCGCAATACGCGCGCGGGCGC<br>T                                       |                      |
| BamHI- <i>mhpDF</i>    | TTT <u>GGATCC</u> <sup>a</sup> ATGACGAAGCATACTCTTGA<br>GCAACT           | BamHI <sup>a</sup>   |
| EcoRI- <i>mhpDR</i>    | TTT <u>GAATTC</u> <sup>a</sup> TCATGACAGACTTCCTTTTGG<br>GG              | EcoRI <sup>a</sup>   |
| <i>mhpD</i> *F         | TGTGTTATGGCGATAACGAAACCATTCTT<br>TTTT                                   |                      |
| <i>mhpD</i> *R         | GTTGCAGAACACGGGAAAAAAGGAATGGT<br>TTCGTTATC                              |                      |
| BamHI- <i>rscAF</i>    | TTT <u>GGATCC</u> <sup>a</sup> ATGTCAACGATTATTATGGA<br>TTTATGTAGTTAC    | BamHI <sup>a</sup>   |
| EcoRI- <i>rscAR</i>    | TTT <u>GAATTC</u> <sup>a</sup> TTAGCGCATGTTGACAAAAA<br>TACC             | EcoRI <sup>a</sup>   |
| <i>rscA</i> *F         | TCTAACAGTCAGCGTATCAAGCACATCAT<br>TAATCAA                                |                      |
| <i>rscA</i> *R         | TATTGGGATGTTGATTAATGATGTGCTTG<br>ATACGC                                 |                      |
| pET24a- <i>tacF</i>    | TCCGCTCACAATCCCATTATACGAGCCG<br>ATGATTAATTGTCAAATTCGCGGGATCG<br>AGATCTC |                      |
| pET24a- <i>tacR</i>    | TCGGCTCGTATAATGGGAATTGTGAGCGG<br>ATAACAATTCC                            |                      |
| <i>panD</i> - pET24aF  | AATGGTGCGCAGCATATGTATATCTCCTT<br>CTTAAAGTTAAACAAAATTATTTCTAGA           |                      |
| <i>panD</i> - pET24aR  | AGCCGCAGCATCTAACCCGAAAGGAAGC<br>TGAGTTGG                                |                      |
| pET24a- <i>panDF</i>   | GAAGGAGATATACATATGCTGCGCACCA<br>TTCTGG                                  |                      |
| pET24a- <i>panDR</i>   | CAGCTTCCTTTTCGGGTTAGATGCTGCGGC<br>TGGTCAAG                              |                      |
| <i>AspDH</i> - pET24aF | CACTTTCTTCATCATATGTATATCTCCTTC<br>TTAAAGTTAAACAAAATTATTTCTAGA           |                      |
| <i>AspDH</i> - pET24aR | CGTGAAGTGGCCTAACCCGAAAGGAAGC<br>TGAGTTGG                                |                      |
| pET24a- <i>AspDHF</i>  | GAAGGAGATATACATATGATGAAGAAAG<br>TGATGCTGATCG                            |                      |
| pET24a- <i>AspDHR</i>  | CAGCTTCCTTTTCGGGTTAGGCCAGTTCAC<br>GGCAC                                 |                      |

|                                        |                                                                  |                    |
|----------------------------------------|------------------------------------------------------------------|--------------------|
| <i>panD</i> - pET24a-<br><i>AspDHF</i> | GCGGGATCGAGATCTGAAGATCGGGCTC<br>GCCACTT                          |                    |
| <i>panD</i> - pET24a-<br><i>AspDHR</i> | TTGAGGGGTTTTTTTTCGGTGATGTCGGCG<br>ATATAGGC                       |                    |
| pET24a- <i>AspDH</i> -<br><i>panDF</i> | GCGAGCCCGATCTTCAGATCTCGATCCCG<br>CGAAAT                          |                    |
| pET24a- <i>AspDH</i> -<br><i>panDR</i> | TCGCCGACATCACCGCAAAAACCCCTC<br>AAGACCCG                          |                    |
| <i>gfp</i> -BamHIF                     | TTT <u>GGATCC</u> <sup>a</sup> ATGAGTAAAGGAGAAGAAC<br>TTTTCACTGG | BamHI <sup>a</sup> |
| <i>gfp</i> -EcoRIR                     | TTT <u>GAATTC</u> <sup>a</sup> TTATTTGTATAGTTCATCCAT<br>GCCATGT  | EcoRI <sup>a</sup> |
| Ypet24aF                               | ATCATGCCATACCGCGAAAGG                                            |                    |
| Ypet24aR                               | GCTTAATGCGCCGCTACAGG                                             |                    |

---

<sup>a</sup> Restriction sites with corresponding restriction enzymes. \* Primer of site-directed mutagenesis.
